# Supplementary material
Source: PubMed Central journal article supplement (PMC6124893)

## Supplemental Material

The Cardiospec™ (Medispec Ltd) ESMR system is a portable unit consisting of a treatment table on top of a shockwave power-cabinet, and a motorized arm holding the ECG monitor, user control panel and main arm. The main arm is composed of an ultrasound probe and the shockwave applicator (SWA) (Supplemental Figure). The SWA consists of a covered stainless steel reflector, a water cushion congested with a biocompatible silicon membrane filled with special saline solution and a submerged electrode (inside the reflector) connected to the high voltage power supply.

Supplemental Figure – Cardiospec™ System

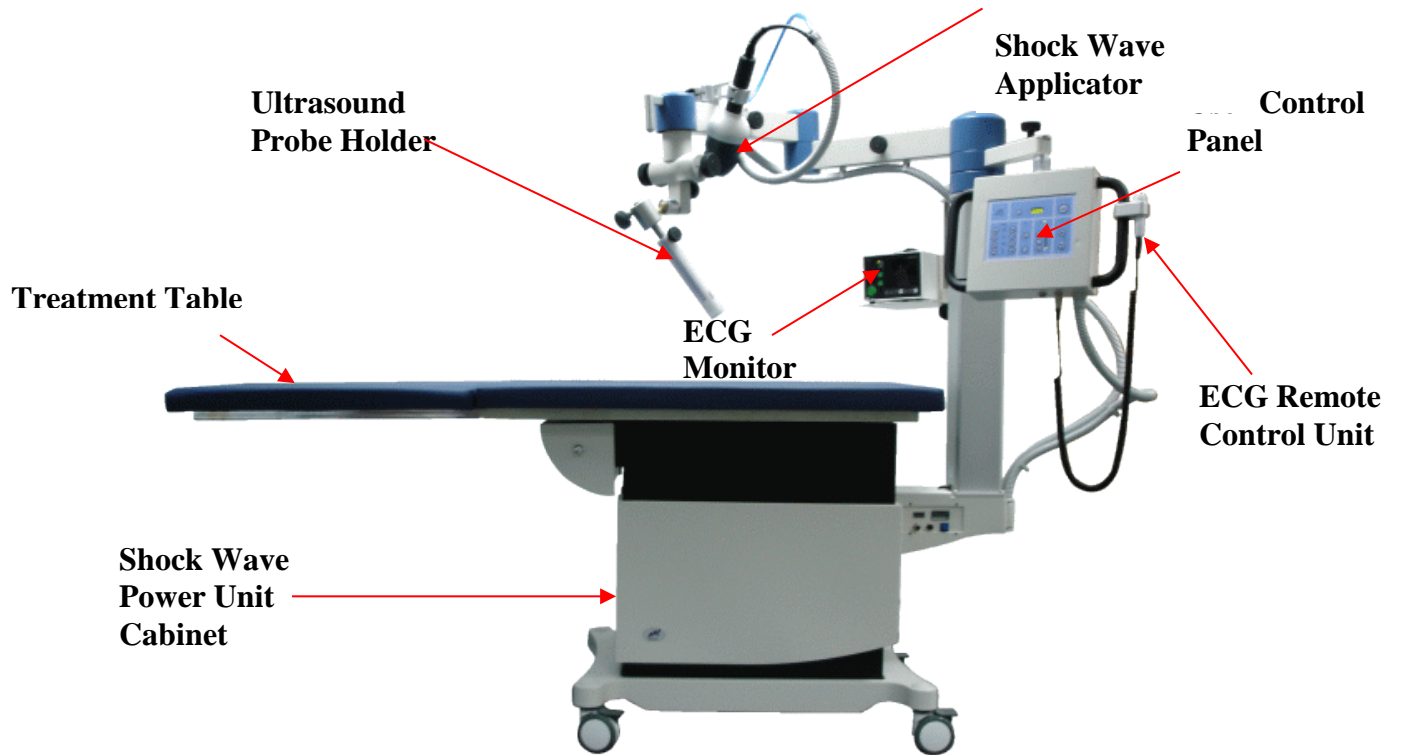

Supplement: NIHMS982951-supplement-Figure.pdf [file NIHMS982951-supplement-Figure.pdf]
